# Supplementary material for: Mutual Fund Revenue Sharing in 401(k) Plans
Source: Atypon-hosted journal article supplement (doi:10.1287/mnsc.2023.01560), 2025-10-17
Supplement: mnsc.2023.01560.sm1.pdf [file mnsc.2023.01560.sm1.pdf]

Internet Appendix  
**Mutual Fund Revenue Sharing in 401(k)  
Plans**

Veronika K. Pool

Clemens Sialm

Irina Stefanescu

**Table IA.1: Example of Plan Menu: Protective Life Corp. 401(k) Plan (2012)**

The table shows the menu options of the 401(k) Plan of Protective Life Corp. in 2012. It also lists the current value (in \$), the expense ratio (in %), and the revenue share (in %) for each of the options.

| Option                                             | Current Value      | Expense Ratio | Revenue Share |
|----------------------------------------------------|--------------------|---------------|---------------|
| <b>Open Architecture Options:</b>                  |                    |               |               |
| Columbia Mid Cap Index Fund                        | 11,233,894         | 0.20          | 0.10          |
| Dodge & Cox International Stock Fund               | 11,698,068         | 0.64          | 0.10          |
| Dodge & Cox Stock Fund                             | 18,436,885         | 0.52          | 0.10          |
| Legg Mason Batterymarch Emerging Markets Fund      | 1,126,377          | 1.27          | 0.10          |
| Neuberger Berman Genesis Fund                      | 15,648,724         | 1.12          | 0.40          |
| PIMCO Real Return Fund                             | 4,408,954          | 0.47          | 0.02          |
| T. Rowe Price Growth Stock Fund                    | 15,089,112         | 0.70          | 0.15          |
| T. Rowe Price Retirement 2015 Fund                 | 3,263,493          | 0.65          | 0.15          |
| T. Rowe Price Retirement 2025 Fund                 | 5,392,003          | 0.73          | 0.15          |
| T. Rowe Price Retirement 2035 Fund                 | 3,267,995          | 0.77          | 0.15          |
| T. Rowe Price Retirement 2045 Fund                 | 2,841,702          | 0.78          | 0.15          |
| Vanguard Total Bond Market Index Fund              | 6,442,237          | 0.22          | 0             |
| <b>Options from Recordkeeper (Fidelity):</b>       |                    |               |               |
| Spartan 500 Index Fund                             | 14,487,232         | 0.05          | -             |
| Fidelity Managed Income II-1 Collective Trust Fund | 24,679,252         |               |               |
| <b>Other Options:</b>                              |                    |               |               |
| Protective Life Corp. Common Stock                 | 49,272,779         |               |               |
| Participant Loans                                  | 5,456,741          |               |               |
| <b>Total</b>                                       | <b>192,745,448</b> |               |               |

**Table IA.2: Service Codes.**

This table provides a description of service codes as provided in the instructions to Form 5500.

| Service Codes |                                                                                                                        |
|---------------|------------------------------------------------------------------------------------------------------------------------|
| 10            | Accounting (including auditing)                                                                                        |
| 11            | Actuarial                                                                                                              |
| 12            | Claims processing                                                                                                      |
| 13            | Contract Administrator                                                                                                 |
| 14            | Plan Administrator                                                                                                     |
| 15            | Recordkeeping and information management (computing, tabulating, data processing, etc)                                 |
| 16            | Consulting (general)                                                                                                   |
| 17            | Consulting (pension)                                                                                                   |
| 18            | Custodial (other than securities)                                                                                      |
| 19            | Custodial (securities)                                                                                                 |
| 20            | Trustee (individual)                                                                                                   |
| 21            | Trustee (bank, trust company, or similar financial institution)                                                        |
| 22            | Insurance agents and brokers                                                                                           |
| 23            | Insurance services                                                                                                     |
| 24            | Trustee (discretionary)                                                                                                |
| 25            | Trustee (directed)                                                                                                     |
| 26            | Investment advisory (participants)                                                                                     |
| 27            | Investment advisory (plan)                                                                                             |
| 28            | Investment management                                                                                                  |
| 29            | Legal                                                                                                                  |
| 30            | Employee (plan)                                                                                                        |
| 31            | Named fiduciary                                                                                                        |
| 32            | Real estate brokerage                                                                                                  |
| 33            | Securities brokerage                                                                                                   |
| 34            | Valuation (appraisals, etc.)                                                                                           |
| 35            | Employee (plan sponsor)                                                                                                |
| 36            | Copying and duplicating                                                                                                |
| 37            | Participant loan processing                                                                                            |
| 38            | Participant communication                                                                                              |
| 40            | Foreign entity (e.g., an agent or broker, bank, insurance company, etc. not operating within jurisdiction of the U.S.) |
| 49            | Other services                                                                                                         |
| 50            | Direct payment from the plan                                                                                           |
| 51            | Investment management fees paid directly by plan                                                                       |
| 52            | Investment management fees paid indirectly by plan                                                                     |
| 53            | Insurance brokerage commissions and fees                                                                               |
| 54            | Sales loads (front end and deferred)                                                                                   |
| 55            | Other commissions                                                                                                      |
| 56            | Non-monetary compensation                                                                                              |
| 57            | Redemption fees                                                                                                        |
| 58            | Product termination fees (surrender charges, etc.)                                                                     |
| 59            | Shareholder servicing fees                                                                                             |
| 60            | Sub-transfer agency fees                                                                                               |
| 61            | Finders fees/placement fees                                                                                            |
| 62            | Float revenue                                                                                                          |

Continued on next page

---

**Service Codes**

---

|    |                                           |
|----|-------------------------------------------|
| 63 | Distribution (12b-1) fees                 |
| 64 | Recordkeeping fees                        |
| 65 | Account maintenance fees                  |
| 66 | Insurance mortality and expense charge    |
| 67 | Other insurance wrap fees                 |
| 68 | Soft dollars commissions                  |
| 70 | Consulting fees                           |
| 71 | Securities brokerage commissions and fees |
| 72 | Other investment fees and expenses        |
| 73 | Other insurance fees and expenses         |
| 99 | Other fees                                |

---

**Table IA.3: Indirect Compensation.**

This table summarizes the indirect compensation information for the universe of 401(k) fillers with DOL for which the identity of the recordkeeper is disclosed on Form 5500. Schedule C, Part 1/2 of the form asks whether the plan has an indirect compensation arrangement. If it does, the plan may disclose indirect payments by 1) reporting the total dollar amount paid to the recordkeeper or 2) indicating that it has received a formula from the recordkeeper. In both cases, indirect payment arrangements are used in the plan, but plans in the first group are not ‘itemizing’ these payments, while plans that receive a formula provide additional details at the payor-payee level on Part 1/3. The number of filers is shown in column 1. Column 2 reports the proportion of plans that report having indirect compensation arrangements, which is broken down by disclosure type in columns 3-4. Some plans disclose the total dollar amount but also indicate that they received a formula. Finally, column 5 reports indirect compensation scaled by total plan assets for the subsample of filers that report indirect compensation as a dollar amount. Panel A includes all filers for which the identity of the recordkeeper is disclosed on Form 5500. In Panel B we repeat these analyses for a balanced panel, which includes the 13,999 plans that are in the DOL dataset for the entire time period.

**Panel A: All Plan Filers**

| Year | N      | Proportion of Plans with Indirect Compensation Schemes |                                     |                                  | Rebate (in bps)<br>(non-itemizers) |
|------|--------|--------------------------------------------------------|-------------------------------------|----------------------------------|------------------------------------|
|      |        | Any Disclosed                                          | \$ Amt Disclosed<br>(non-itemizers) | Formula Disclosed<br>(itemizers) |                                    |
|      | (1)    | (2)                                                    | (3)                                 | (4)                              | (5)                                |
| 2010 | 42,480 | 65.5%                                                  | 20.9%                               | 53.1%                            | 36                                 |
| 2011 | 43,607 | 66.9%                                                  | 21.1%                               | 54.5%                            | 40                                 |
| 2012 | 44,622 | 66.1%                                                  | 16.4%                               | 54.3%                            | 47                                 |
| 2013 | 45,230 | 62.4%                                                  | 12.8%                               | 53.8%                            | 30                                 |
| 2014 | 46,492 | 60.5%                                                  | 12.3%                               | 52.3%                            | 27                                 |
| 2015 | 47,742 | 59.2%                                                  | 11.5%                               | 51.5%                            | 24                                 |
| 2016 | 48,242 | 59.7%                                                  | 10.9%                               | 52.4%                            | 22                                 |
| 2017 | 49,869 | 58.6%                                                  | 10.1%                               | 52.0%                            | 20                                 |
| 2018 | 51,264 | 56.4%                                                  | 9.1%                                | 50.3%                            | 18                                 |
| 2019 | 53,126 | 54.0%                                                  | 8.4%                                | 48.3%                            | 16                                 |
| 2020 | 54,527 | 52.1%                                                  | 7.2%                                | 47.2%                            | 13                                 |
| 2021 | 55,452 | 51.7%                                                  | 6.7%                                | 46.7%                            | 12                                 |
| 2022 | 57,455 | 51.5%                                                  | 6.8%                                | 46.3%                            | 11                                 |

**Panel B: Plans that File Continuously During 2010-2022**

| Year | N      | Proportion of Plans with Indirect Compensation Schemes |                                     |                                  | Rebate (in bps)<br>(non-itemizers) |
|------|--------|--------------------------------------------------------|-------------------------------------|----------------------------------|------------------------------------|
|      |        | Any Disclosed                                          | \$ Amt Disclosed<br>(non-itemizers) | Formula Disclosed<br>(itemizers) |                                    |
|      | (1)    | (2)                                                    | (3)                                 | (4)                              | (5)                                |
| 2010 | 14,619 | 64.5%                                                  | 16.9%                               | 55.3%                            | 30                                 |
| 2011 | 14,619 | 66.2%                                                  | 17.2%                               | 57.0%                            | 27                                 |
| 2012 | 14,619 | 66.0%                                                  | 13.4%                               | 57.1%                            | 31                                 |
| 2013 | 14,619 | 64.4%                                                  | 12.2%                               | 56.4%                            | 27                                 |
| 2014 | 14,619 | 63.2%                                                  | 11.7%                               | 55.4%                            | 23                                 |
| 2015 | 14,619 | 62.2%                                                  | 11.2%                               | 54.8%                            | 20                                 |
| 2016 | 14,619 | 62.2%                                                  | 10.2%                               | 55.4%                            | 19                                 |
| 2017 | 14,619 | 62.1%                                                  | 9.7%                                | 55.9%                            | 18                                 |
| 2018 | 14,619 | 61.0%                                                  | 8.4%                                | 55.5%                            | 16                                 |
| 2019 | 14,619 | 59.2%                                                  | 7.4%                                | 54.5%                            | 15                                 |
| 2020 | 14,619 | 58.8%                                                  | 6.8%                                | 54.3%                            | 11                                 |
| 2021 | 14,619 | 59.0%                                                  | 6.6%                                | 54.2%                            | 11                                 |
| 2022 | 14,619 | 58.0%                                                  | 6.1%                                | 53.7%                            | 9                                  |

**Table IA.4: American Funds Fundamental Investors Expense Structure in 2013.**

Panel A of the table reports annual fund reporting expenses as a percentage of the value of the investment, as provided in the prospectus of these funds as of [March 1, 2013](#). “Other expenses” include custodial, legal and transfer agent (and, if applicable, sub-transfer agent/recordkeeping) payments and various other expenses applicable to all share classes. For employer-sponsored retirement plans, the amount paid for sub-transfer agent/ recordkeeping services varies depending on the share class selected. Panel B shows the maximum payments to entities providing these services to retirement plans (from page 33 of the prospectus), which are part of ‘other expenses’ in Panel A.

Panel A: Annual Fund Reporting Expenses

|                                   | R-1   | R-2   | R-3   | R-4   | R-5   | R-6   |
|-----------------------------------|-------|-------|-------|-------|-------|-------|
| Management fees                   | 0.25% | 0.25% | 0.25% | 0.25% | 0.25% | 0.25% |
| Distribution/service (12b-1) fees | 1.00% | 0.74% | 0.50% | 0.25% | none  | none  |
| Other expenses                    | 0.17% | 0.41% | 0.21% | 0.16% | 0.11% | 0.06% |
| Total fund operating expenses     | 1.42% | 1.40% | 0.96% | 0.66% | 0.36% | 0.31% |

Panel B: Payments to Unaffiliated Entities

|           |                                                  |
|-----------|--------------------------------------------------|
| Class A   | 0.05% of assets or \$12 per participant position |
| Class R-1 | 0.10% of assets                                  |
| Class R-2 | 0.25% of assets                                  |
| Class R-3 | 0.15% of assets                                  |
| Class R-4 | 0.10% of assets                                  |
| Class R-5 | 0.05% of assets                                  |
| Class R-6 | none                                             |

**Table IA.5: Fund Deletions, Linear Probability Model.**

The table reports coefficient estimates for a linear probability model  $DEL_{p,f,t} = \beta RevenueShare_{p,f,t-1} + \Gamma' Controls_{p,f,t-1} + \epsilon_{p,f,t}$ , where  $DEL_{p,f,t}$  is an indicator variable that takes the value of one if mutual fund  $f$  is deleted from plan  $p$  at time  $t$ . In columns 1-3,  $RevenueShare_{p,f,t-1}$  *Fund* is an indicator variable that takes the value of one if fund  $f$  revenue shares in plan  $p$  at the end of year  $t - 1$ . In columns 4-6 of the table,  $RevenueShare_{p,f,t-1}$  *Percentage* is the amount of rebate that fund  $f$  pays to plan  $p$ 's recordkeeper at the end of year  $t - 1$ . **Controls** $_{f,p,t-1}$  is the vector of control variables. In addition to those listed, the model includes fund controls, which are fund style and type dummies as well as fund age, size, and turnover. All variables are described in Table A.1. Standard errors are clustered at the fund level. Significance levels are denoted by \*, \*\*, \*\*\*, which correspond to 10%, 5%, and 1% levels, respectively.

|                             | (1)                  | (2)                  | (3)                  | (4)                  | (5)                  | (6)                  |
|-----------------------------|----------------------|----------------------|----------------------|----------------------|----------------------|----------------------|
| Revenue Sharing Fund        | -0.035***<br>(0.008) | -0.032***<br>(0.009) | -0.023***<br>(0.008) |                      |                      |                      |
| Revenue Sharing Percentage  |                      |                      |                      | -0.099***<br>(0.029) | -0.085**<br>(0.033)  | -0.044<br>(0.032)    |
| Prior 3-year Performance    | -0.001***<br>(0.000) | -0.001***<br>(0.000) | -0.001***<br>(0.000) | -0.001***<br>(0.000) | -0.001**<br>(0.000)  | -0.001***<br>(0.000) |
| Expense Ratio               | 0.092***<br>(0.025)  | 0.151<br>(0.109)     | 0.073***<br>(0.025)  | 0.085***<br>(0.023)  | 0.129<br>(0.111)     | 0.065***<br>(0.023)  |
| Log(Option Size)            | -0.009***<br>(0.002) | -0.008***<br>(0.003) | -0.012***<br>(0.003) | -0.009***<br>(0.002) | -0.008***<br>(0.003) | -0.012***<br>(0.003) |
| Log(Plan Assets)            | 0.009**<br>(0.004)   | 0.012***<br>(0.004)  | -0.044<br>(0.041)    | 0.009**<br>(0.005)   | 0.011**<br>(0.005)   | -0.051<br>(0.042)    |
| Log(Average Account Size)   | -0.006<br>(0.004)    | -0.010**<br>(0.004)  | -0.029<br>(0.026)    | -0.007<br>(0.005)    | -0.011**<br>(0.005)  | -0.033<br>(0.026)    |
| Perc of Affiliated Funds    | -0.049***<br>(0.012) | -0.036***<br>(0.011) | 0.122**<br>(0.050)   | -0.049***<br>(0.012) | -0.035***<br>(0.011) | 0.145***<br>(0.051)  |
| Employer Match              | 0.014**<br>(0.006)   | 0.011*<br>(0.006)    | -0.070***<br>(0.020) | 0.021***<br>(0.007)  | 0.018**<br>(0.008)   | -0.072***<br>(0.020) |
| Perc in Employer Securities | -0.086***<br>(0.026) | -0.081***<br>(0.027) | -0.222<br>(0.157)    | -0.090***<br>(0.027) | -0.086***<br>(0.027) | -0.241<br>(0.157)    |
| Unionization                | -0.018***<br>(0.006) | -0.017***<br>(0.006) | 0.079***<br>(0.021)  | -0.016***<br>(0.006) | -0.015**<br>(0.006)  | 0.075***<br>(0.019)  |
| Plan Age                    | 0.029***<br>(0.004)  | 0.022***<br>(0.004)  | -0.016<br>(0.021)    | 0.031***<br>(0.004)  | 0.023***<br>(0.004)  | -0.013<br>(0.021)    |
| MFoptions                   | 0.003***<br>(0.000)  | 0.002***<br>(0.000)  | 0.008***<br>(0.001)  | 0.003***<br>(0.000)  | 0.002***<br>(0.000)  | 0.008***<br>(0.001)  |
| Bundled Services            | -0.001<br>(0.001)    | -0.001<br>(0.001)    | -0.001<br>(0.007)    | -0.001<br>(0.001)    | -0.001<br>(0.001)    | 0.003<br>(0.007)     |
| Flow Volatility             | 0.249***<br>(0.022)  | 0.241***<br>(0.024)  |                      | 0.252***<br>(0.023)  | 0.242***<br>(0.025)  |                      |
| Plan Complexity             | 0.008***<br>(0.001)  | 0.006***<br>(0.001)  | 0.007*<br>(0.004)    | 0.008***<br>(0.001)  | 0.006***<br>(0.001)  | 0.008*<br>(0.004)    |
| Participant Loans           | 0.784***<br>(0.244)  | 0.504**<br>(0.245)   | -1.504<br>(1.391)    | 0.845***<br>(0.252)  | 0.619**<br>(0.247)   | -1.252<br>(1.409)    |
| Eligible Compensation       | 0.003<br>(0.008)     | 0.007<br>(0.008)     | -0.033**<br>(0.015)  | 0.008<br>(0.008)     | 0.010<br>(0.008)     | -0.023<br>(0.016)    |
| Fund Controls               | YES                  | YES                  | YES                  | YES                  | YES                  | YES                  |
| Year FE                     | YES                  | YES                  | YES                  | YES                  | YES                  | YES                  |
| Fund FE                     | NO                   | YES                  | NO                   | NO                   | YES                  | NO                   |
| Plan FE                     | NO                   | NO                   | YES                  | NO                   | NO                   | YES                  |
| Observations                | 14,892               | 14,552               | 14,888               | 14,471               | 14,130               | 14,465               |
| R-squared                   | 0.117                | 0.242                | 0.254                | 0.119                | 0.243                | 0.257                |

**Table IA.6: Fund Deletions, Linear Probability Model, Other Specifications.**

The table reports coefficient estimates for a linear probability model  $DEL_{p,f,t} = \beta RevenueShare_{p,f,t-1} + \Gamma' Controls_{p,f,t-1} + \epsilon_{p,f,t}$ , where  $DEL_{p,f,t}$  is an indicator variable that takes the value of one if mutual fund  $f$  is deleted from plan  $p$  at time  $t$ . In columns 1-3,  $RevenueShare_{p,f,t-1}$   $Fund$  is an indicator variable that takes the value of one if fund  $f$  revenue shares in plan  $p$  at the end of year  $t - 1$ . In columns 4-6 of the table,  $RevenueShare_{p,f,t-1}$   $Percentage$  is the amount of rebate that fund  $f$  pays to plan  $p$ 's recordkeeper at the end of year  $t - 1$ . **Controls** $_{f,p,t-1}$  is the vector of control variables. In addition to those listed, the model includes fund controls, which are fund style and type dummies as well as fund age, size, and turnover. All variables are described in Table A.1. Standard errors are clustered at the fund level. Significance levels are denoted by \*, \*\*, \*\*\*, which correspond to 10%, 5%, and 1% levels, respectively.

|                             | (1)                  | (2)                  | (3)                  | (4)                  | (5)                  | (6)                  | (7)                  | (8)                  |
|-----------------------------|----------------------|----------------------|----------------------|----------------------|----------------------|----------------------|----------------------|----------------------|
| Revenue Sharing Fund        | -0.027***<br>(0.008) | -0.025**<br>(0.010)  | -0.016*<br>(0.009)   | -0.036***<br>(0.010) |                      |                      |                      |                      |
| Revenue Sharing Percentage  |                      |                      |                      |                      | -0.061**<br>(0.031)  | -0.061*<br>(0.035)   | -0.025<br>(0.034)    | -0.095***<br>(0.033) |
| Prior 3-year Performance    | -0.001***<br>(0.000) | -0.001***<br>(0.000) | -0.001***<br>(0.000) |                      | -0.001***<br>(0.000) | -0.001**<br>(0.000)  | -0.001**<br>(0.000)  |                      |
| Expense Ratio               | 0.081***<br>(0.025)  | 0.146<br>(0.111)     | 0.099<br>(0.105)     |                      | 0.072***<br>(0.023)  | 0.128<br>(0.112)     | 0.084<br>(0.105)     |                      |
| Log(Option Size)            | -0.009***<br>(0.002) | -0.008***<br>(0.003) | -0.017***<br>(0.003) | -0.004*<br>(0.003)   | -0.009***<br>(0.002) | -0.008***<br>(0.003) | -0.017***<br>(0.003) | -0.004<br>(0.003)    |
| Log(Plan Assets)            | 0.012***<br>(0.004)  | 0.013***<br>(0.005)  | -0.048<br>(0.039)    | 0.011**<br>(0.004)   | 0.011**<br>(0.005)   | 0.011**<br>(0.005)   | -0.054<br>(0.039)    | 0.009*<br>(0.005)    |
| Log(Average Account Size)   | -0.002<br>(0.005)    | -0.008*<br>(0.005)   | -0.026<br>(0.023)    | -0.015***<br>(0.004) | -0.003<br>(0.005)    | -0.007<br>(0.005)    | -0.024<br>(0.023)    | -0.014***<br>(0.004) |
| Perc of Affiliated Funds    | -0.027*<br>(0.015)   | -0.028*<br>(0.014)   | 0.070<br>(0.048)     | -0.044***<br>(0.011) | -0.026*<br>(0.015)   | -0.025*<br>(0.014)   | 0.079<br>(0.050)     | -0.043***<br>(0.011) |
| Employer Match              | 0.015**<br>(0.007)   | 0.011<br>(0.007)     | -0.066***<br>(0.018) | 0.010<br>(0.006)     | 0.023***<br>(0.008)  | 0.017**<br>(0.008)   | -0.065***<br>(0.018) | 0.017**<br>(0.007)   |
| Perc in Employer Securities | -0.104***<br>(0.027) | -0.103***<br>(0.028) | -0.359**<br>(0.149)  | -0.085***<br>(0.026) | -0.107***<br>(0.027) | -0.105***<br>(0.029) | -0.380**<br>(0.148)  | -0.088***<br>(0.026) |
| Unionization                | -0.015**<br>(0.006)  | -0.014**<br>(0.006)  | 0.076**<br>(0.020)   | -0.018***<br>(0.006) | -0.013**<br>(0.006)  | -0.013**<br>(0.006)  | 0.067***<br>(0.018)  | -0.016***<br>(0.006) |
| Plan Age                    | 0.029***<br>(0.004)  | 0.022***<br>(0.004)  | -0.028<br>(0.020)    | 0.022***<br>(0.004)  | 0.030***<br>(0.004)  | 0.023***<br>(0.004)  | -0.023<br>(0.020)    | 0.023***<br>(0.004)  |
| MFoptions                   | 0.003***<br>(0.000)  | 0.002***<br>(0.000)  | 0.007***<br>(0.001)  | 0.002***<br>(0.000)  | 0.003***<br>(0.000)  | 0.003***<br>(0.000)  | 0.007***<br>(0.001)  | 0.002***<br>(0.000)  |
| Bundled Services            | -0.016***<br>(0.003) | -0.014***<br>(0.003) | 0.008<br>(0.007)     | -0.002<br>(0.001)    | -0.017***<br>(0.003) | -0.015***<br>(0.003) | 0.012*<br>(0.007)    | -0.002<br>(0.001)    |
| Flow Volatility             | 0.235***<br>(0.022)  | 0.239***<br>(0.025)  |                      | 0.233***<br>(0.024)  | 0.237***<br>(0.023)  | 0.239***<br>(0.026)  |                      | 0.236***<br>(0.024)  |
| Plan Complexity             | 0.008***<br>(0.001)  | 0.006***<br>(0.001)  | 0.011***<br>(0.004)  | 0.003***<br>(0.001)  | 0.008***<br>(0.001)  | 0.006***<br>(0.001)  | 0.011***<br>(0.004)  | 0.003***<br>(0.001)  |
| Participant Loans           | 0.984***<br>(0.262)  | 0.531*<br>(0.272)    | -2.107*<br>(1.266)   | 0.642***<br>(0.234)  | 0.977***<br>(0.270)  | 0.589**<br>(0.275)   | -2.048<br>(1.284)    | 0.699***<br>(0.236)  |
| Eligible Compensation       | 0.052***<br>(0.011)  | 0.037***<br>(0.011)  | -0.031**<br>(0.013)  | 0.005<br>(0.008)     | 0.059***<br>(0.012)  | 0.043***<br>(0.012)  | -0.023<br>(0.015)    | 0.007<br>(0.008)     |
| Fund Controls               | YES                  |
| Year FE                     | YES                  |
| RK FE                       | YES                  | YES                  | NO                   | NO                   | YES                  | YES                  | NO                   | NO                   |
| Fund FE                     | NO                   | YES                  | YES                  | NO                   | NO                   | YES                  | YES                  | NO                   |
| Plan FE                     | NO                   | NO                   | YES                  | NO                   | NO                   | NO                   | YES                  | NO                   |
| Fund-year FE                | NO                   | NO                   | NO                   | YES                  | NO                   | NO                   | NO                   | YES                  |
| Observations                | 14,892               | 14,552               | 14,546               | 13,270               | 14,471               | 14,130               | 14,123               | 12,867               |
| R-squared                   | 0.129                | 0.250                | 0.360                | 0.356                | 0.131                | 0.252                | 0.363                | 0.355                |

**Table IA.7: Fund Deletions, Plans Below- and Above-Median Total Assets.**

The table re-estimates the baseline logit model described in Table 4 for the subsample of plans with below- and above-median total assets, respectively. The empirical specifications and controls are identical to those in Table 4. Significance levels are denoted by \*, \*\*, \*\*\*, which correspond to 10%, 5%, and 1% levels, respectively.

| <b>Panel A: Using the Revenue Sharing Indicator</b> |                      |                      |                      |                      |                      |                         |
|-----------------------------------------------------|----------------------|----------------------|----------------------|----------------------|----------------------|-------------------------|
|                                                     | (1)                  |                      | (2)                  |                      | (3)                  |                         |
|                                                     | SMALL                | LARGE                | SMALL                | LARGE                | SMALL                | LARGE                   |
| Revenue Sharing Fund                                | -0.505***<br>(0.102) | -0.089<br>(0.106)    | -0.791***<br>(0.150) | -0.225<br>(0.159)    | -0.496***<br>(0.136) | 0.062<br>(0.141)        |
| Prior 3-year Performance                            | -0.013***<br>(0.003) | -0.016***<br>(0.003) | -0.006<br>(0.006)    | -0.016***<br>(0.005) | -0.018***<br>(0.003) | -0.017***<br>(0.003)    |
| Expense Ratio                                       | 0.881***<br>(0.289)  | 0.889***<br>(0.277)  | 1.753<br>(2.027)     | 2.050<br>(1.303)     | 0.681*<br>(0.361)    | 0.826**<br>(0.332)      |
| Log(Option Size)                                    | -0.118***<br>(0.025) | -0.033<br>(0.024)    | -0.124***<br>(0.042) | -0.048<br>(0.048)    | -0.170***<br>(0.033) | -0.090**<br>(0.035)     |
| Log(Plan Assets)                                    | 0.280***<br>(0.097)  | 0.091<br>(0.077)     | 0.266*<br>(0.144)    | 0.241*<br>(0.130)    | -0.465<br>(0.635)    | -0.665<br>(0.759)       |
| Log(Average Account Size)                           | 0.006<br>(0.075)     | -0.143**<br>(0.069)  | -0.133<br>(0.112)    | -0.310***<br>(0.102) | -0.038<br>(0.447)    | -2.642***<br>(0.892)    |
| Perc of Affiliated Funds                            | -0.439**<br>(0.182)  | -0.331*<br>(0.192)   | -0.578**<br>(0.262)  | -0.380<br>(0.302)    | 2.834***<br>(0.766)  | 0.086<br>(1.067)        |
| Employer Match                                      | -0.130<br>(0.125)    | 0.114<br>(0.100)     | 0.167<br>(0.210)     | -0.083<br>(0.145)    | -1.485***<br>(0.430) | -1.586***<br>(0.582)    |
| Perc in Employer Securities                         | -1.867***<br>(0.473) | -0.300<br>(0.461)    | -2.480***<br>(0.693) | -0.203<br>(0.755)    | -2.511<br>(3.054)    | -8.257**<br>(3.887)     |
| Unionization                                        | -0.419***<br>(0.123) | -0.090<br>(0.104)    | -0.528***<br>(0.167) | -0.164<br>(0.158)    | 0.423<br>(0.579)     | 1.703***<br>(0.484)     |
| Plan Age                                            | 0.439***<br>(0.076)  | 0.298***<br>(0.080)  | 0.442***<br>(0.133)  | 0.534***<br>(0.140)  | -1.715**<br>(0.692)  | 0.293<br>(0.726)        |
| MFoptions                                           | 0.028***<br>(0.004)  | 0.021***<br>(0.002)  | 0.024***<br>(0.007)  | 0.027***<br>(0.005)  | 0.039***<br>(0.009)  | 0.115***<br>(0.027)     |
| Bundled Services                                    | -0.034<br>(0.028)    | 0.055**<br>(0.022)   | -0.016<br>(0.039)    | 0.073**<br>(0.033)   | -0.087<br>(0.107)    | 0.204<br>(0.130)        |
| Flow Volatility                                     | 1.927***<br>(0.264)  | 2.693***<br>(0.213)  | 3.101***<br>(0.473)  | 3.298***<br>(0.390)  | -6.330<br>(5.175)    | -80.214<br>(71.656)     |
| Plan Complexity                                     | 0.055**<br>(0.026)   | 0.081***<br>(0.019)  | 0.001<br>(0.037)     | 0.072***<br>(0.028)  | -0.438***<br>(0.114) | 0.261***<br>(0.086)     |
| Participant Loans                                   | 17.553***<br>(3.686) | -4.595<br>(4.255)    | 18.119***<br>(5.332) | -8.448<br>(5.769)    | -28.618<br>(29.026)  | -132.038***<br>(48.825) |
| Eligible Compensation                               | 0.184<br>(0.145)     | -0.317**<br>(0.125)  | 0.302<br>(0.211)     | -0.345*<br>(0.202)   | -0.425<br>(0.276)    | -0.112<br>(0.240)       |
| Fund Controls                                       | YES                  | YES                  | YES                  | YES                  | YES                  | YES                     |
| Year FE                                             | YES                  | YES                  | YES                  | YES                  | YES                  | YES                     |
| Fund FE                                             | NO                   | NO                   | YES                  | YES                  | NO                   | NO                      |
| Plan FE                                             | NO                   | NO                   | NO                   | NO                   | YES                  | YES                     |
| Observations                                        | 7,171                | 7,721                | 5,732                | 5,985                | 6,057                | 6,514                   |

**Panel B: Using the Revenue Sharing Percentage**

|                             | (1)                  |                      | (2)                  |                      | (3)                  |                         |
|-----------------------------|----------------------|----------------------|----------------------|----------------------|----------------------|-------------------------|
|                             | SMALL                | LARGE                | SMALL                | LARGE                | SMALL                | LARGE                   |
| Revenue Sharing Percentage  | -0.838***<br>(0.324) | -0.567<br>(0.408)    | -1.488***<br>(0.541) | -0.542<br>(0.650)    | -0.535<br>(0.457)    | 0.054<br>(0.524)        |
| Prior 3-year Performance    | -0.013***<br>(0.003) | -0.015***<br>(0.003) | -0.004<br>(0.006)    | -0.015***<br>(0.005) | -0.017***<br>(0.003) | -0.017***<br>(0.003)    |
| Expense Ratio               | 0.723***<br>(0.277)  | 0.918***<br>(0.270)  | 1.409<br>(2.065)     | 1.761<br>(1.352)     | 0.540<br>(0.343)     | 0.799**<br>(0.321)      |
| Log(Option Size)            | -0.131***<br>(0.025) | -0.028<br>(0.025)    | -0.127***<br>(0.042) | -0.062<br>(0.052)    | -0.187***<br>(0.032) | -0.075**<br>(0.037)     |
| Log(Plan Assets)            | 0.250**<br>(0.103)   | 0.072<br>(0.080)     | 0.131<br>(0.155)     | 0.305**<br>(0.138)   | -0.598<br>(0.645)    | -0.857<br>(0.764)       |
| Log(Average Account Size)   | 0.023<br>(0.078)     | -0.148**<br>(0.070)  | -0.111<br>(0.112)    | -0.280**<br>(0.110)  | 0.020<br>(0.461)     | -2.726***<br>(0.899)    |
| Perc of Affiliated Funds    | -0.509***<br>(0.189) | -0.272<br>(0.190)    | -0.725***<br>(0.271) | -0.191<br>(0.303)    | 3.553***<br>(0.734)  | 0.007<br>(1.394)        |
| Employer Match              | -0.095<br>(0.126)    | 0.262**<br>(0.112)   | 0.318<br>(0.205)     | 0.135<br>(0.175)     | -1.531***<br>(0.450) | -1.447**<br>(0.585)     |
| Perc in Employer Securities | -1.882***<br>(0.489) | -0.420<br>(0.475)    | -2.698***<br>(0.746) | -0.568<br>(0.773)    | -2.961<br>(3.066)    | -9.884**<br>(3.987)     |
| Unionization                | -0.348***<br>(0.119) | -0.070<br>(0.111)    | -0.507***<br>(0.168) | -0.137<br>(0.168)    | 1.287**<br>(0.621)   | 1.487***<br>(0.461)     |
| Plan Age                    | 0.454***<br>(0.078)  | 0.343***<br>(0.082)  | 0.441***<br>(0.132)  | 0.560***<br>(0.139)  | -1.772**<br>(0.709)  | 0.442<br>(0.764)        |
| MFoptions                   | 0.029***<br>(0.004)  | 0.022***<br>(0.002)  | 0.025***<br>(0.007)  | 0.029***<br>(0.005)  | 0.037***<br>(0.008)  | 0.122***<br>(0.029)     |
| Bundled Services            | -0.030<br>(0.031)    | 0.042*<br>(0.022)    | -0.013<br>(0.044)    | 0.060*<br>(0.036)    | -0.082<br>(0.107)    | 0.261*<br>(0.135)       |
| Flow Volatility             | 1.873***<br>(0.265)  | 2.787***<br>(0.227)  | 3.219***<br>(0.489)  | 3.382***<br>(0.370)  | -5.783<br>(5.216)    | -88.763<br>(73.817)     |
| Plan Complexity             | 0.046*<br>(0.027)    | 0.076***<br>(0.020)  | 0.005<br>(0.039)     | 0.077**<br>(0.030)   | -0.495***<br>(0.122) | 0.258***<br>(0.086)     |
| Participant Loans           | 17.085***<br>(3.571) | -3.575<br>(4.553)    | 16.889***<br>(5.260) | -6.030<br>(6.246)    | -23.630<br>(29.369)  | -151.773***<br>(51.090) |
| Eligible Compensation       | 0.271*<br>(0.156)    | -0.312**<br>(0.127)  | 0.451**<br>(0.223)   | -0.376*<br>(0.204)   | -0.196<br>(0.324)    | 0.016<br>(0.242)        |
| Fund Controls               | YES                  | YES                  | YES                  | YES                  | YES                  | YES                     |
| Year FE                     | YES                  | YES                  | YES                  | YES                  | YES                  | YES                     |
| Fund FE                     | NO                   | NO                   | YES                  | YES                  | NO                   | NO                      |
| Plan FE                     | NO                   | NO                   | NO                   | NO                   | YES                  | YES                     |
| Observations                | 6,992                | 7,479                | 5,549                | 5,784                | 5,796                | 6,235                   |

**Table IA.8: Fund Additions, Plans Below- and Above-Median Total Assets.**

The table re-estimates the baseline logit model described in Table 5 for the subsample of plans with below- and above-median total assets, respectively. The empirical specifications and controls are identical to those in Table 5. Significance levels are denoted by \*, \*\*, \*\*\*, which correspond to 10%, 5%, and 1% levels, respectively.

| <b>Panel A: Using the Probability of Revenue Sharing</b> |                      |                      |                      |                      |
|----------------------------------------------------------|----------------------|----------------------|----------------------|----------------------|
|                                                          | (1)                  |                      | (2)                  |                      |
|                                                          | SMALL                | LARGE                | SMALL                | LARGE                |
| Probability of Revenue Sharing                           | 0.919***<br>(0.183)  | 0.172<br>(0.225)     | 0.946***<br>(0.185)  | 0.150<br>(0.226)     |
| Prior 3-year Performance                                 | 0.014***<br>(0.003)  | 0.008**<br>(0.004)   | 0.015***<br>(0.003)  | 0.008**<br>(0.004)   |
| Expense Ratio                                            | -1.162***<br>(0.307) | -2.213***<br>(0.349) | -1.135***<br>(0.307) | -2.243***<br>(0.355) |
| Log(Plan Assets)                                         | -0.295***<br>(0.059) | -0.086<br>(0.070)    | -2.251***<br>(0.366) | -1.762***<br>(0.675) |
| Log(Average Account Size)                                | -0.020<br>(0.045)    | -0.157***<br>(0.055) | -0.057<br>(0.182)    | 0.478<br>(0.365)     |
| Perc of Affiliated Funds                                 | -2.271***<br>(0.174) | -1.496***<br>(0.158) | -4.816***<br>(0.465) | -6.764***<br>(0.903) |
| No. of Funds in the Same Style                           | -0.302***<br>(0.047) | -0.222***<br>(0.037) | -0.204***<br>(0.042) | -0.197***<br>(0.039) |
| Employer Match                                           | -0.115<br>(0.099)    | -0.120<br>(0.095)    | -0.780***<br>(0.284) | -0.134<br>(0.210)    |
| Perc in Employer Securities                              | -1.421***<br>(0.323) | -0.984***<br>(0.293) | -5.585***<br>(1.540) | -0.450<br>(2.161)    |
| Unionization                                             | -0.087<br>(0.075)    | 0.055<br>(0.075)     | -0.383<br>(0.263)    | 0.268<br>(0.257)     |
| Plan Age                                                 | 0.058<br>(0.044)     | -0.015<br>(0.057)    | 0.259<br>(0.359)     | 1.583***<br>(0.398)  |
| MFoptions                                                | 0.054***<br>(0.002)  | 0.037***<br>(0.002)  | 0.069***<br>(0.007)  | 0.052***<br>(0.008)  |
| Bundled Services                                         | -0.093***<br>(0.021) | -0.026<br>(0.020)    | 0.163**<br>(0.081)   | 0.097<br>(0.091)     |
| Flow Volatility                                          | 1.191***<br>(0.144)  | 0.498**<br>(0.202)   | -4.542***<br>(1.109) | 2.259<br>(3.624)     |
| Plan Complexity                                          | 0.064***<br>(0.017)  | 0.035**<br>(0.016)   | 0.236***<br>(0.063)  | 0.225***<br>(0.054)  |
| Participant Loans                                        | 10.341***<br>(2.286) | -0.532<br>(3.547)    | -17.242<br>(12.305)  | 6.490<br>(16.301)    |
| Eligible Compensation                                    | 0.291***<br>(0.092)  | 0.032<br>(0.086)     | -0.214<br>(0.184)    | -0.052<br>(0.194)    |
| Fund Controls                                            | YES                  | YES                  | YES                  | YES                  |
| Year FE                                                  | YES                  | YES                  | YES                  | YES                  |
| Plan FE                                                  | NO                   | NO                   | YES                  | YES                  |
| Observations                                             | 950,443              | 954,435              | 845,775              | 767,069              |

**Panel B: Using the Revenue Sharing Percentage**

|                                | (1)                  |                      | (2)                  |                      |
|--------------------------------|----------------------|----------------------|----------------------|----------------------|
|                                | SMALL                | LARGE                | SMALL                | LARGE                |
| Average Revenue Sharing        | 2.789***<br>(0.664)  | 0.269<br>(0.982)     | 2.829***<br>(0.667)  | 0.235<br>(0.986)     |
| Prior 3-year Performance       | 0.014***<br>(0.003)  | 0.008**<br>(0.004)   | 0.014***<br>(0.003)  | 0.008**<br>(0.004)   |
| Expense Ratio                  | -1.127***<br>(0.301) | -2.177***<br>(0.348) | -1.100***<br>(0.301) | -2.213***<br>(0.356) |
| Log(Plan Assets)               | -0.293***<br>(0.059) | -0.086<br>(0.070)    | -2.276***<br>(0.368) | -1.767***<br>(0.676) |
| Log(Average Account Size)      | -0.021<br>(0.045)    | -0.157***<br>(0.055) | -0.070<br>(0.183)    | 0.472<br>(0.365)     |
| Perc of Affiliated Funds       | -2.263***<br>(0.174) | -1.495***<br>(0.158) | -4.811***<br>(0.464) | -6.766***<br>(0.904) |
| No. of Funds in the Same Style | -0.307***<br>(0.047) | -0.223***<br>(0.037) | -0.208***<br>(0.042) | -0.197***<br>(0.039) |
| Employer Match                 | -0.114<br>(0.099)    | -0.120<br>(0.095)    | -0.793***<br>(0.286) | -0.135<br>(0.210)    |
| Perc in Employer Securities    | -1.428***<br>(0.323) | -0.986***<br>(0.293) | -5.540***<br>(1.541) | -0.434<br>(2.163)    |
| Unionization                   | -0.085<br>(0.075)    | 0.055<br>(0.075)     | -0.381<br>(0.263)    | 0.267<br>(0.257)     |
| Plan Age                       | 0.058<br>(0.044)     | -0.015<br>(0.057)    | 0.212<br>(0.365)     | 1.582***<br>(0.398)  |
| MFoptions                      | 0.054***<br>(0.002)  | 0.037***<br>(0.002)  | 0.068***<br>(0.007)  | 0.052***<br>(0.008)  |
| Bundled Services               | -0.095***<br>(0.021) | -0.026<br>(0.020)    | 0.167**<br>(0.080)   | 0.097<br>(0.091)     |
| Flow Volatility                | 1.187***<br>(0.144)  | 0.497**<br>(0.202)   | -4.749***<br>(1.100) | 2.269<br>(3.634)     |
| Plan Complexity                | 0.064***<br>(0.017)  | 0.035**<br>(0.016)   | 0.242***<br>(0.063)  | 0.225***<br>(0.054)  |
| Participant Loans              | 10.317***<br>(2.285) | -0.522<br>(3.547)    | -19.399<br>(12.564)  | 6.758<br>(16.303)    |
| Eligible Compensation          | 0.291***<br>(0.092)  | 0.032<br>(0.086)     | -0.208<br>(0.184)    | -0.052<br>(0.194)    |
| Fund Controls                  | YES                  | YES                  | YES                  | YES                  |
| Year FE                        | YES                  | YES                  | YES                  | YES                  |
| Plan FE                        | NO                   | NO                   | YES                  | YES                  |
| Observations                   | 950,443              | 954,435              | 845,775              | 767,069              |

**Table IA.9: Fund Deletions with Affiliated Funds.**

The table re-estimates the baseline logit model described in Table 4 using an augmented sample that includes affiliated funds. Since revenue sharing is not available for affiliated funds, ‘*Revenue Sharing Fund*’ and ‘*Revenue Sharing Percentage*’ are set to zero and the regression includes an indicator variable for affiliated funds. The empirical specifications and controls are otherwise identical to those in Table 4. Significance levels are denoted by \*, \*\*, \*\*\*, which correspond to 10%, 5%, and 1% levels, respectively.

|                             | (1)                  | (2)                  | (3)                  | (4)                  | (5)                  | (6)                  |
|-----------------------------|----------------------|----------------------|----------------------|----------------------|----------------------|----------------------|
| Revenue Sharing Fund        | -0.353***<br>(0.080) | -0.396***<br>(0.091) | -0.367***<br>(0.103) |                      |                      |                      |
| Revenue Sharing Percentage  |                      |                      |                      | -1.080***<br>(0.284) | -1.042***<br>(0.329) | -1.101***<br>(0.346) |
| Affiliated Fund             | 0.124<br>(0.109)     | -0.694***<br>(0.107) | 0.217<br>(0.136)     | 0.178<br>(0.113)     | -0.637***<br>(0.104) | 0.295**<br>(0.147)   |
| Prior 3-year Performance    | -0.013***<br>(0.002) | -0.005**<br>(0.002)  | -0.012***<br>(0.002) | -0.012***<br>(0.002) | -0.004**<br>(0.002)  | -0.012***<br>(0.002) |
| Expense Ratio               | 1.821***<br>(0.287)  | 0.325<br>(0.740)     | 2.044***<br>(0.353)  | 1.828***<br>(0.279)  | 0.166<br>(0.740)     | 2.065***<br>(0.344)  |
| Log(Option Size)            | -0.059***<br>(0.015) | -0.074***<br>(0.016) | -0.130***<br>(0.023) | -0.060***<br>(0.015) | -0.076***<br>(0.016) | -0.131***<br>(0.022) |
| Log(Plan Assets)            | -0.008<br>(0.033)    | 0.068**<br>(0.034)   | 0.590*<br>(0.305)    | -0.009<br>(0.034)    | 0.061*<br>(0.035)    | 0.535*<br>(0.305)    |
| Log(Average Account Size)   | -0.060<br>(0.038)    | 0.027<br>(0.050)     | -0.695***<br>(0.238) | -0.068*<br>(0.038)   | 0.029<br>(0.050)     | -0.718***<br>(0.243) |
| Perc of Affiliated Funds    | -0.575***<br>(0.111) | -0.503***<br>(0.136) | 3.262***<br>(0.389)  | -0.567***<br>(0.112) | -0.485***<br>(0.138) | 3.708***<br>(0.384)  |
| Employer Match              | 0.009<br>(0.047)     | 0.006<br>(0.058)     | -0.572***<br>(0.190) | 0.049<br>(0.050)     | 0.043<br>(0.060)     | -0.603***<br>(0.192) |
| Perc in Employer Securities | -0.347*<br>(0.182)   | -0.504**<br>(0.218)  | 0.365<br>(1.240)     | -0.344*<br>(0.188)   | -0.495**<br>(0.223)  | 0.278<br>(1.224)     |
| Unionization                | -0.066<br>(0.041)    | -0.177***<br>(0.049) | 1.063***<br>(0.143)  | -0.053<br>(0.041)    | -0.165***<br>(0.049) | 1.111***<br>(0.135)  |
| Plan Age                    | 0.188***<br>(0.028)  | 0.105***<br>(0.037)  | 0.847**<br>(0.376)   | 0.194***<br>(0.028)  | 0.108***<br>(0.037)  | 0.844**<br>(0.376)   |
| MFoptions                   | 0.019***<br>(0.001)  | 0.019***<br>(0.002)  | 0.047***<br>(0.005)  | 0.020***<br>(0.001)  | 0.019***<br>(0.002)  | 0.047***<br>(0.005)  |
| Bundled Services            | -0.123***<br>(0.023) | 0.019<br>(0.017)     | -0.154***<br>(0.051) | -0.128***<br>(0.023) | 0.016<br>(0.018)     | -0.136***<br>(0.051) |
| Flow Volatility             | 1.373***<br>(0.124)  | 1.725***<br>(0.162)  | 2.194<br>(2.017)     | 1.357***<br>(0.124)  | 1.716***<br>(0.161)  | 2.260<br>(1.987)     |
| Plan Complexity             | 0.060***<br>(0.011)  | 0.062***<br>(0.011)  | 0.158***<br>(0.042)  | 0.058***<br>(0.011)  | 0.062***<br>(0.012)  | 0.167***<br>(0.042)  |
| Participant Loans           | 0.400<br>(1.627)     | -1.650<br>(1.948)    | -12.853<br>(14.769)  | 0.554<br>(1.646)     | -1.130<br>(1.967)    | -10.238<br>(14.886)  |
| Eligible Compensation       | -0.019<br>(0.071)    | 0.051<br>(0.094)     | -0.059<br>(0.135)    | 0.018<br>(0.072)     | 0.085<br>(0.097)     | 0.054<br>(0.147)     |
| Fund Controls               | YES                  | YES                  | YES                  | YES                  | YES                  | YES                  |
| Year FE                     | YES                  | YES                  | YES                  | YES                  | YES                  | YES                  |
| Fund FE                     | NO                   | YES                  | NO                   | NO                   | YES                  | NO                   |
| Plan FE                     | NO                   | NO                   | YES                  | NO                   | NO                   | YES                  |
| Observations                | 28,864               | 26,642               | 26,763               | 28,443               | 26,232               | 26,236               |

**Table IA.10: Fund Additions with Affiliated Funds.**

The table re-estimates the baseline logit model described in Table 5 using an augmented sample that includes affiliated funds. As in Table IA.9, ‘Probability of Revenue Sharing’ and ‘Average Revenue Sharing’ are set to zero and the regression includes an indicator variable for affiliated funds. The empirical specifications and controls are otherwise identical to those in Table 5. Significance levels are denoted by \*, \*\*, \*\*\*, which correspond to 10%, 5%, and 1% levels, respectively.

|                                | (1)                  | (2)                   | (3)                  | (4)                   |
|--------------------------------|----------------------|-----------------------|----------------------|-----------------------|
| Probability of Revenue Sharing | 0.867***<br>(0.185)  | 0.835***<br>(0.187)   |                      |                       |
| Average Revenue Sharing        |                      |                       | 3.135***<br>(0.728)  | 2.922***<br>(0.725)   |
| Affiliated Fund                | 1.682***<br>(0.123)  | 1.631***<br>(0.124)   | 1.632***<br>(0.121)  | 1.579***<br>(0.120)   |
| Prior 3-year Performance       | 0.008***<br>(0.003)  | 0.009***<br>(0.003)   | 0.008***<br>(0.003)  | 0.009***<br>(0.003)   |
| Expense Ratio                  | -2.151***<br>(0.307) | -2.081***<br>(0.293)  | -2.131***<br>(0.303) | -2.058***<br>(0.290)  |
| Log(Plan Assets)               | -0.279***<br>(0.031) | -1.901***<br>(0.236)  | -0.279***<br>(0.031) | -1.898***<br>(0.236)  |
| Log(Average Account Size)      | -0.045<br>(0.029)    | 0.195*<br>(0.117)     | -0.044<br>(0.029)    | 0.195*<br>(0.117)     |
| Perc of Affiliated Funds       | -1.069***<br>(0.089) | -3.384***<br>(0.296)  | -1.063***<br>(0.089) | -3.382***<br>(0.297)  |
| No. of Funds in the Same Style | -0.228***<br>(0.029) | -0.174***<br>(0.028)  | -0.230***<br>(0.029) | -0.177***<br>(0.029)  |
| Employer Match                 | -0.098<br>(0.066)    | -0.404***<br>(0.144)  | -0.099<br>(0.066)    | -0.403***<br>(0.144)  |
| Perc in Employer Securities    | -0.670***<br>(0.199) | -2.799**<br>(1.092)   | -0.677***<br>(0.199) | -2.791**<br>(1.092)   |
| Unionization                   | -0.048<br>(0.044)    | -0.217<br>(0.132)     | -0.048<br>(0.044)    | -0.219*<br>(0.132)    |
| Plan Age                       | 0.082***<br>(0.028)  | 0.195<br>(0.202)      | 0.082***<br>(0.028)  | 0.195<br>(0.202)      |
| MFoptions                      | 0.043***<br>(0.001)  | 0.057***<br>(0.005)   | 0.043***<br>(0.001)  | 0.057***<br>(0.005)   |
| Bundled Services               | 0.024<br>(0.015)     | 0.142***<br>(0.045)   | 0.022<br>(0.015)     | 0.141***<br>(0.045)   |
| Flow Volatility                | 0.977***<br>(0.092)  | 82.816***<br>(30.113) | 0.972***<br>(0.091)  | 82.672***<br>(30.119) |
| Plan Complexity                | 0.039***<br>(0.010)  | 0.170***<br>(0.032)   | 0.039***<br>(0.010)  | 0.170***<br>(0.032)   |
| Participant Loans              | 0.906<br>(1.655)     | -1.607<br>(8.336)     | 0.912<br>(1.655)     | -1.639<br>(8.342)     |
| Eligible Compensation          | 0.097<br>(0.072)     | -0.184<br>(0.123)     | 0.098<br>(0.072)     | -0.183<br>(0.123)     |
| Fund Controls                  | YES                  | YES                   | YES                  | YES                   |
| Year FE                        | YES                  | YES                   | YES                  | YES                   |
| Plan FE                        | NO                   | YES                   | NO                   | YES                   |
| Observations                   | 2,058,719            | 1,876,890             | 2,058,719            | 1,876,890             |

**Table IA.11: Fund Deletions, Revenue Sharing, and 12b1 Fees.**

The table re-estimates the baseline logit model described in Table 4 by adding 12b1 fees as an additional control. The empirical specifications and controls are identical to those in Table 4. Significance levels are denoted by \*, \*\*, \*\*\*, which correspond to 10%, 5%, and 1% levels, respectively.

|                             | (1)                  | (2)                  | (3)                  | (4)                  | (5)                  | (6)                  | (7)                  | (8)                  | (9)                   |
|-----------------------------|----------------------|----------------------|----------------------|----------------------|----------------------|----------------------|----------------------|----------------------|-----------------------|
| Revenue Sharing Fund        | -0.295***<br>(0.079) |                      |                      | -0.384***<br>(0.105) |                      |                      | -0.250**<br>(0.106)  |                      |                       |
| Revenue Sharing Percentage  |                      | -0.812***<br>(0.284) |                      |                      | -1.046***<br>(0.377) |                      |                      | -0.552<br>(0.385)    |                       |
| 12b1 Fee                    | 1.647***<br>(0.593)  | 1.669***<br>(0.564)  | 1.500**<br>(0.595)   | -2.695<br>(2.597)    | -2.712<br>(2.619)    | -3.180<br>(2.511)    | 2.407***<br>(0.720)  | 2.313***<br>(0.697)  | 2.320***<br>(0.725)   |
| Prior 3-year Performance    | -0.013***<br>(0.002) | -0.012***<br>(0.002) | -0.013***<br>(0.002) | -0.013***<br>(0.004) | -0.012***<br>(0.004) | -0.013***<br>(0.004) | -0.016***<br>(0.003) | -0.015***<br>(0.003) | -0.015***<br>(0.003)  |
| Expense Ratio               | 0.796***<br>(0.249)  | 0.755***<br>(0.236)  | 0.607**<br>(0.250)   | 2.053*<br>(1.119)    | 1.752<br>(1.119)     | 2.256**<br>(1.081)   | 0.729**<br>(0.286)   | 0.686**<br>(0.270)   | 0.609**<br>(0.289)    |
| Log(Option Size)            | -0.053***<br>(0.018) | -0.058***<br>(0.018) | -0.061***<br>(0.018) | -0.081***<br>(0.028) | -0.086***<br>(0.028) | -0.081***<br>(0.027) | -0.121***<br>(0.026) | -0.121***<br>(0.026) | -0.129***<br>(0.025)  |
| Log(Plan Assets)            | 0.011<br>(0.044)     | 0.014<br>(0.046)     | 0.018<br>(0.046)     | 0.065<br>(0.065)     | 0.048<br>(0.073)     | 0.059<br>(0.069)     | -0.513<br>(0.465)    | -0.619<br>(0.470)    | -0.529<br>(0.455)     |
| Log(Average Account Size)   | -0.017<br>(0.047)    | -0.024<br>(0.048)    | -0.013<br>(0.047)    | -0.135**<br>(0.063)  | -0.125*<br>(0.065)   | -0.116*<br>(0.063)   | -0.415<br>(0.406)    | -0.445<br>(0.420)    | -0.415<br>(0.396)     |
| Perc of Affiliated Funds    | -0.334**<br>(0.130)  | -0.337***<br>(0.129) | -0.355***<br>(0.128) | -0.405**<br>(0.172)  | -0.359**<br>(0.174)  | -0.413**<br>(0.167)  | 2.093***<br>(0.613)  | 2.693***<br>(0.618)  | 0.945<br>(0.626)      |
| Employer Match              | 0.119<br>(0.074)     | 0.207**<br>(0.081)   | 0.151**<br>(0.074)   | 0.093<br>(0.107)     | 0.189*<br>(0.115)    | 0.121<br>(0.108)     | -1.521***<br>(0.342) | -1.520***<br>(0.344) | -1.556***<br>(0.344)  |
| Perc in Employer Securities | -0.923***<br>(0.351) | -0.937***<br>(0.361) | -0.756**<br>(0.334)  | -1.214**<br>(0.487)  | -1.265**<br>(0.501)  | -0.920**<br>(0.456)  | -3.912*<br>(2.330)   | -4.510*<br>(2.417)   | -4.786**<br>(2.372)   |
| Unionization                | -0.178**<br>(0.074)  | -0.147*<br>(0.076)   | -0.175**<br>(0.073)  | -0.231**<br>(0.101)  | -0.207**<br>(0.103)  | -0.231**<br>(0.099)  | 1.414***<br>(0.387)  | 1.491***<br>(0.371)  | 1.334***<br>(0.360)   |
| Plan Age                    | 0.369***<br>(0.055)  | 0.395***<br>(0.057)  | 0.402***<br>(0.055)  | 0.409***<br>(0.083)  | 0.437***<br>(0.084)  | 0.442***<br>(0.084)  | -0.520<br>(0.496)    | -0.451<br>(0.495)    | -0.633<br>(0.492)     |
| MFoptions                   | 0.021***<br>(0.002)  | 0.022***<br>(0.002)  | 0.019***<br>(0.002)  | 0.020***<br>(0.003)  | 0.021***<br>(0.003)  | 0.018***<br>(0.003)  | 0.078***<br>(0.013)  | 0.078***<br>(0.013)  | 0.073***<br>(0.011)   |
| Bundled Services            | -0.004<br>(0.017)    | -0.009<br>(0.018)    | 0.012<br>(0.017)     | 0.003<br>(0.022)     | -0.003<br>(0.023)    | 0.025<br>(0.022)     | 0.012<br>(0.077)     | 0.051<br>(0.079)     | 0.033<br>(0.074)      |
| Flow Volatility             | 2.346***<br>(0.187)  | 2.392***<br>(0.191)  | 2.475***<br>(0.192)  | 3.025***<br>(0.301)  | 3.085***<br>(0.291)  | 3.291***<br>(0.307)  | -1.778<br>(7.734)    | -2.005<br>(7.812)    | -1.501<br>(7.738)     |
| Plan Complexity             | 0.086***<br>(0.015)  | 0.079***<br>(0.016)  | 0.093***<br>(0.015)  | 0.083***<br>(0.021)  | 0.082***<br>(0.023)  | 0.088***<br>(0.021)  | 0.054<br>(0.061)     | 0.070<br>(0.062)     | 0.081<br>(0.059)      |
| Participant Loans           | 7.994***<br>(2.745)  | 8.535***<br>(2.799)  | 7.931***<br>(2.681)  | 6.874*<br>(3.680)    | 8.789**<br>(3.690)   | 6.847*<br>(3.621)    | -38.253<br>(23.298)  | -37.848<br>(23.877)  | -49.754**<br>(23.022) |
| Eligible Compensation       | -0.038<br>(0.088)    | 0.009<br>(0.092)     | -0.004<br>(0.084)    | 0.032<br>(0.114)     | 0.054<br>(0.119)     | 0.082<br>(0.109)     | -0.440**<br>(0.176)  | -0.315<br>(0.198)    | -0.467***<br>(0.170)  |
| Fund Controls               | YES                   |
| Year FE                     | YES                   |
| Fund FE                     | NO                   | NO                   | NO                   | YES                  | YES                  | YES                  | NO                   | NO                   | NO                    |
| Plan FE                     | NO                   | NO                   | NO                   | NO                   | NO                   | NO                   | YES                  | YES                  | YES                   |
| Observations                | 14,362               | 13,949               | 14,598               | 12,443               | 12,041               | 12,683               | 12,156               | 11,620               | 12,411                |

**Table IA.12: Fund Additions, Revenue Sharing, and 12b1 fees.**

The table re-estimates the baseline logit model described in Table 5 by adding 12b1 fees as an additional control. The empirical specifications and controls are identical to those in Table 5. Significance levels are denoted by \*, \*\*, \*\*\*, which correspond to 10%, 5%, and 1% levels, respectively.

|                                | (1)                  | (2)                    | (3)                  | (4)                    | (5)                  | (6)                    |
|--------------------------------|----------------------|------------------------|----------------------|------------------------|----------------------|------------------------|
| Probability of Revenue Sharing | 0.582***<br>(0.178)  | 0.589***<br>(0.178)    |                      |                        |                      |                        |
| Average Revenue Sharing        |                      |                        | 1.873***<br>(0.679)  | 1.878***<br>(0.680)    |                      |                        |
| 12b1 Fee                       | -1.364***<br>(0.376) | -1.367***<br>(0.375)   | -1.387***<br>(0.375) | -1.389***<br>(0.374)   | -1.386***<br>(0.377) | -1.389***<br>(0.376)   |
| Prior 3-year Performance       | 0.011***<br>(0.003)  | 0.011***<br>(0.003)    | 0.011***<br>(0.003)  | 0.011***<br>(0.003)    | 0.010***<br>(0.003)  | 0.011***<br>(0.003)    |
| Expense Ratio                  | -1.446***<br>(0.316) | -1.443***<br>(0.318)   | -1.409***<br>(0.311) | -1.407***<br>(0.315)   | -1.255***<br>(0.304) | -1.253***<br>(0.307)   |
| Log(Plan Assets)               | -0.255***<br>(0.035) | -2.309***<br>(0.287)   | -0.254***<br>(0.035) | -2.305***<br>(0.287)   | -0.254***<br>(0.035) | -2.303***<br>(0.286)   |
| Log(Average Account Size)      | -0.049<br>(0.035)    | 0.134<br>(0.153)       | -0.049<br>(0.035)    | 0.135<br>(0.153)       | -0.049<br>(0.035)    | 0.134<br>(0.153)       |
| Perc of Affiliated Funds       | -1.874***<br>(0.140) | -4.791***<br>(0.383)   | -1.869***<br>(0.140) | -4.789***<br>(0.383)   | -1.867***<br>(0.140) | -4.786***<br>(0.383)   |
| No. of Funds in the Same Style | -0.271***<br>(0.038) | -0.209***<br>(0.037)   | -0.273***<br>(0.038) | -0.212***<br>(0.037)   | -0.274***<br>(0.038) | -0.212***<br>(0.037)   |
| Employer Match                 | -0.045<br>(0.075)    | -0.521***<br>(0.196)   | -0.046<br>(0.075)    | -0.520***<br>(0.196)   | -0.046<br>(0.075)    | -0.520***<br>(0.196)   |
| Perc in Employer Securities    | -1.171***<br>(0.245) | -2.946**<br>(1.194)    | -1.176***<br>(0.245) | -2.938**<br>(1.194)    | -1.176***<br>(0.245) | -2.940**<br>(1.194)    |
| Unionization                   | -0.053<br>(0.049)    | 0.074<br>(0.174)       | -0.053<br>(0.049)    | 0.074<br>(0.174)       | -0.053<br>(0.049)    | 0.073<br>(0.174)       |
| Plan Age                       | 0.024<br>(0.031)     | 0.657**<br>(0.280)     | 0.024<br>(0.031)     | 0.657**<br>(0.280)     | 0.024<br>(0.031)     | 0.657**<br>(0.280)     |
| MFOptions                      | 0.045***<br>(0.002)  | 0.056***<br>(0.005)    | 0.045***<br>(0.002)  | 0.056***<br>(0.005)    | 0.045***<br>(0.002)  | 0.056***<br>(0.005)    |
| Bundled Services               | -0.065***<br>(0.015) | 0.111*<br>(0.061)      | -0.066***<br>(0.015) | 0.110*<br>(0.061)      | -0.065***<br>(0.015) | 0.111*<br>(0.061)      |
| Flow Volatility                | 0.887***<br>(0.100)  | 100.818***<br>(29.999) | 0.884***<br>(0.100)  | 100.643***<br>(30.010) | 0.884***<br>(0.100)  | 100.562***<br>(30.016) |
| Plan Complexity                | 0.057***<br>(0.012)  | 0.256***<br>(0.040)    | 0.057***<br>(0.012)  | 0.256***<br>(0.040)    | 0.057***<br>(0.012)  | 0.256***<br>(0.040)    |
| Participant Loans              | 7.021***<br>(2.085)  | -2.721<br>(10.888)     | 7.028***<br>(2.085)  | -2.741<br>(10.891)     | 7.014***<br>(2.087)  | -2.762<br>(10.896)     |
| Eligible Compensation          | 0.173***<br>(0.065)  | -0.254*<br>(0.132)     | 0.173***<br>(0.065)  | -0.252*<br>(0.132)     | 0.173***<br>(0.065)  | -0.252*<br>(0.132)     |
| Fund Controls                  | YES                  | YES                    | YES                  | YES                    | YES                  | YES                    |
| Year FE                        | YES                  | YES                    | YES                  | YES                    | YES                  | YES                    |
| Plan FE                        | NO                   | YES                    | NO                   | YES                    | NO                   | YES                    |
| Observations                   | 1,882,651            | 1,622,561              | 1,882,651            | 1,622,561              | 1,882,651            | 1,622,561              |

**Table IA.13: Subsample Analysis Excluding Large Recordkeepers.**

This table reports the coefficient estimates for our explanatory variables of interest following our baseline deletion and additions models from Tables 4 and 5 in the paper, respectively. The estimation excludes each of the 5 largest recordkeepers (based on the total 401(k) assets they administer in our sample) one by one, starting with the largest being excluded in the first column. Panel A contains the coefficient estimates for the no fixed effects model, while Panels B and C tabulate coefficient estimates from the fund and plan fixed effects specifications.

| <b>Panel A: No Fund FEs</b> |                     |                      |                      |                      |                      |
|-----------------------------|---------------------|----------------------|----------------------|----------------------|----------------------|
|                             | FID                 | VAN                  | JPM                  | PRI                  | MGI                  |
| Revenue Sharing Fund        |                     |                      |                      |                      |                      |
| Deletions                   | -0.199**<br>(0.093) | -0.219***<br>(0.080) | -0.322***<br>(0.077) | -0.219***<br>(0.076) | -0.193**<br>(0.088)  |
|                             | 7,420               | 14,030               | 13,541               | 13,899               | 12,874               |
| Additions                   | 0.751***<br>(0.220) | 0.613***<br>(0.178)  | 0.564***<br>(0.180)  | 0.625***<br>(0.177)  | 0.628***<br>(0.179)  |
|                             | 972,244             | 1,678,825            | 1,737,590            | 1,692,535            | 1,748,445            |
| Revenue Sharing Percentage  |                     |                      |                      |                      |                      |
| Deletions                   | -0.645*<br>(0.370)  | -0.508*<br>(0.292)   | -0.791***<br>(0.277) | -0.568**<br>(0.285)  | -0.363<br>(0.297)    |
|                             | 7,011               | 13,609               | 13,255               | 13,479               | 12,454               |
| Additions                   | 1.463<br>(0.925)    | 1.916***<br>(0.675)  | 1.785***<br>(0.691)  | 1.966***<br>(0.680)  | 2.186***<br>(0.693)  |
|                             | 972,244             | 1,678,825            | 1,737,590            | 1,692,535            | 1,748,445            |
| <b>Panel B: Fund FEs</b>    |                     |                      |                      |                      |                      |
| Revenue Sharing Fund        |                     |                      |                      |                      |                      |
| Deletions                   | -0.170<br>(0.142)   | -0.331***<br>(0.116) | -0.461***<br>(0.105) | -0.340***<br>(0.105) | -0.235*<br>(0.129)   |
|                             | 5,987               | 11,991               | 11,662               | 11,906               | 10,924               |
| Revenue Sharing Percentage  |                     |                      |                      |                      |                      |
| Deletions                   | -0.080<br>(0.584)   | -0.770*<br>(0.408)   | -1.109***<br>(0.381) | -0.838**<br>(0.395)  | -0.300<br>(0.423)    |
|                             | 5,622               | 11,588               | 11,389               | 11,500               | 10,531               |
| <b>Panel C: Plan FEs</b>    |                     |                      |                      |                      |                      |
| Revenue Sharing Fund        |                     |                      |                      |                      |                      |
| Deletions                   | -0.180<br>(0.124)   | -0.167<br>(0.103)    | -0.244**<br>(0.103)  | -0.153<br>(0.101)    | -0.309***<br>(0.103) |
|                             | 6,502               | 12,082               | 11,477               | 11,961               | 10,778               |
| Additions                   | 0.730***<br>(0.221) | 0.627***<br>(0.179)  | 0.570***<br>(0.181)  | 0.637***<br>(0.177)  | 0.647***<br>(0.178)  |
|                             | 811,104             | 1,478,685            | 1,503,237            | 1,471,527            | 1,497,502            |
| Revenue Sharing Percentage  |                     |                      |                      |                      |                      |
| Deletions                   | -0.655<br>(0.541)   | -0.202<br>(0.377)    | -0.451<br>(0.361)    | -0.248<br>(0.387)    | -0.519<br>(0.380)    |
|                             | 5,988               | 11,538               | 11,109               | 11,412               | 10,235               |
| Additions                   | 1.379<br>(0.934)    | 1.941***<br>(0.673)  | 1.792***<br>(0.693)  | 1.983***<br>(0.679)  | 2.212***<br>(0.689)  |
|                             | 811,104             | 1,478,685            | 1,503,237            | 1,471,527            | 1,497,502            |

**Table IA.14: Revenue Sharing and Plan Costs Paid by Participants, Other Specifications.**

The table reports coefficient estimates for the following OLS model:  $PlanCost_{p,t} = \beta RSplan_{p,t} + \Gamma'Controls_{p,t} + \epsilon_{p,t}$ . In columns 1,2,5, and 6,  $PlanCost_{p,t}$  is the asset weighted average expense ratio in plan  $p$  in year  $t$ . In columns 3,4,7, and 8,  $PlanCost_{p,t}$  is the all-in fee of plan participants, calculated as the sum of administrative fees (expressed as a percent of plan assets) and the average expense ratio of the plan's mutual fund options.  $Controls_{p,t}$  is the vector of control variables. In addition to those listed, the model includes fund controls, which are plan-level value-weighted average fund characteristics such as fund style and type, as well as fund performance, age, size, and turnover. All variables are described in Table A.1. Standard errors are clustered at the plan level. Significance levels are denoted by \*, \*\*, \*\*\*, which correspond to 10%, 5%, and 1% levels, respectively

|                             | Avg Expense Ratio    |                     | All-in Fees          |                      | Avg Expense Ratio    |                     | All-in Fees          |                      |
|-----------------------------|----------------------|---------------------|----------------------|----------------------|----------------------|---------------------|----------------------|----------------------|
|                             | (1)                  | (2)                 | (3)                  | (4)                  | (5)                  | (6)                 | (7)                  | (8)                  |
| Revenue Sharing Plan        | 0.029***<br>(0.007)  | 0.015**<br>(0.006)  | 0.024***<br>(0.009)  | 0.014**<br>(0.006)   |                      |                     |                      |                      |
| Average Revenue Sharing     |                      |                     |                      |                      | 0.271***<br>(0.033)  | 0.160***<br>(0.033) | 0.232***<br>(0.043)  | 0.186***<br>(0.034)  |
| Log(Average Option Size)    | -0.001<br>(0.003)    | 0.001<br>(0.002)    | -0.005<br>(0.004)    | 0.002<br>(0.003)     | -0.000<br>(0.003)    | 0.001<br>(0.002)    | -0.005<br>(0.004)    | 0.002<br>(0.003)     |
| Log(Plan Assets)            | -0.013***<br>(0.005) | -0.039**<br>(0.016) | -0.014**<br>(0.006)  | -0.065***<br>(0.017) | -0.011**<br>(0.005)  | -0.038**<br>(0.016) | -0.012**<br>(0.006)  | -0.064***<br>(0.017) |
| Log(Average Account Size)   | -0.028***<br>(0.006) | 0.006<br>(0.011)    | -0.057***<br>(0.008) | 0.003<br>(0.013)     | -0.025***<br>(0.006) | 0.008<br>(0.011)    | -0.054***<br>(0.008) | 0.005<br>(0.012)     |
| Perc of Affiliated Funds    | 0.067***<br>(0.019)  | 0.105**<br>(0.046)  | 0.013<br>(0.022)     | 0.089**<br>(0.045)   | 0.049***<br>(0.019)  | 0.078*<br>(0.045)   | -0.004<br>(0.021)    | 0.059<br>(0.044)     |
| Employer Match              | -0.003<br>(0.008)    | 0.002<br>(0.009)    | 0.016<br>(0.012)     | 0.010<br>(0.010)     | -0.003<br>(0.008)    | 0.003<br>(0.009)    | 0.017<br>(0.012)     | 0.011<br>(0.010)     |
| Perc in Employer Securities | 0.024<br>(0.031)     | -0.008<br>(0.065)   | -0.007<br>(0.039)    | -0.069<br>(0.073)    | 0.018<br>(0.031)     | -0.007<br>(0.065)   | -0.011<br>(0.039)    | -0.066<br>(0.072)    |
| Unionization                | -0.001<br>(0.008)    | -0.005<br>(0.009)   | 0.015<br>(0.010)     | 0.005<br>(0.009)     | -0.002<br>(0.007)    | -0.006<br>(0.009)   | 0.014<br>(0.010)     | 0.004<br>(0.009)     |
| Plan Age                    | -0.000<br>(0.006)    | -0.013<br>(0.015)   | -0.002<br>(0.007)    | -0.000<br>(0.017)    | 0.001<br>(0.006)     | -0.016<br>(0.016)   | -0.001<br>(0.007)    | -0.004<br>(0.017)    |
| MFoptions                   | 0.000<br>(0.000)     | -0.000<br>(0.001)   | 0.000<br>(0.000)     | -0.001<br>(0.001)    | 0.000<br>(0.000)     | -0.000<br>(0.001)   | 0.000<br>(0.000)     | -0.001<br>(0.001)    |
| Bundled Services            | 0.001<br>(0.002)     | 0.005**<br>(0.002)  | 0.003<br>(0.003)     | 0.006**<br>(0.003)   | 0.001<br>(0.002)     | 0.005**<br>(0.002)  | 0.004<br>(0.003)     | 0.005*<br>(0.002)    |
| Flow Volatility             | 0.019<br>(0.019)     |                     | 0.012<br>(0.021)     |                      | 0.023<br>(0.019)     |                     | 0.016<br>(0.021)     |                      |
| Plan Complexity             | -0.000<br>(0.002)    | 0.001<br>(0.002)    | 0.008***<br>(0.002)  | -0.000<br>(0.002)    | -0.000<br>(0.002)    | 0.001<br>(0.002)    | 0.008***<br>(0.002)  | -0.000<br>(0.002)    |
| Participant Loans           | -0.353<br>(0.267)    | 0.325<br>(0.613)    | 0.061<br>(0.319)     | 0.537<br>(0.595)     | -0.375<br>(0.264)    | 0.364<br>(0.602)    | 0.044<br>(0.317)     | 0.570<br>(0.597)     |
| Eligible Compensation       | 0.001<br>(0.009)     | 0.026***<br>(0.009) | -0.023*<br>(0.013)   | 0.018*<br>(0.010)    | 0.002<br>(0.009)     | 0.024***<br>(0.009) | -0.023*<br>(0.013)   | 0.015<br>(0.009)     |
| Average Fund Controls       | YES                  | YES                 | YES                  | YES                  | YES                  | YES                 | YES                  | YES                  |
| Year FE                     | YES                  | YES                 | YES                  | YES                  | YES                  | YES                 | YES                  | YES                  |
| RK FE                       | YES                  | YES                 | YES                  | YES                  | YES                  | YES                 | YES                  | YES                  |
| Plan FE                     | NO                   | YES                 | NO                   | YES                  | NO                   | YES                 | NO                   | YES                  |
| Observations                | 3,147                | 3,107               | 3,147                | 3,107                | 3,140                | 3,100               | 3,140                | 3,100                |
| R-squared                   | 0.744                | 0.923               | 0.709                | 0.923                | 0.750                | 0.925               | 0.713                | 0.924                |

**Table IA.15: Revenue Sharing and Administrative Costs Paid by Participants.**

The table reports coefficient estimates for the following OLS model:  $PlanCost_{p,t} = \beta RSplan_{p,t} + \mathbf{\Gamma}'\mathbf{Controls}_{p,t} + \epsilon_{p,t}$ .  $PlanCost_{p,t}$  is the administrative direct cost in plan  $p$  in year  $t$ .  $\mathbf{Controls}_{f,p,t-1}$  is the vector of control variables. In addition to those listed, the model includes fund controls, which are plan-level value-weighted average fund characteristics such as fund style and type, as well as fund performance, age, size, and turnover. All variables are described in Table A.1. Standard errors are clustered at the plan level. Significance levels are denoted by \*, \*\*, \*\*\*, which correspond to 10%, 5%, and 1% levels, respectively

|                             | (1)       | (2)      | (3)       | (4)     | (5)       | (6)      | (7)       | (8)     |
|-----------------------------|-----------|----------|-----------|---------|-----------|----------|-----------|---------|
| Revenue Sharing Plan        | -0.009*   | -0.000   | -0.006    | -0.000  |           |          |           |         |
|                             | (0.005)   | (0.003)  | (0.005)   | (0.003) |           |          |           |         |
| Average Revenue Sharing     |           |          |           |         | -0.049**  | 0.023    | -0.039    | 0.026*  |
|                             |           |          |           |         | (0.024)   | (0.016)  | (0.025)   | (0.014) |
| Log(Average Option Size)    | -0.004*   | 0.001    | -0.004**  | 0.001   | -0.004*   | 0.001    | -0.004**  | 0.001   |
|                             | (0.002)   | (0.001)  | (0.002)   | (0.001) | (0.002)   | (0.001)  | (0.002)   | (0.001) |
| Log(Plan Assets)            | 0.000     | -0.025*  | -0.001    | -0.026* | -0.000    | -0.025*  | -0.001    | -0.026* |
|                             | (0.003)   | (0.014)  | (0.003)   | (0.014) | (0.004)   | (0.014)  | (0.004)   | (0.014) |
| Log(Average Account Size)   | -0.031*** | -0.005   | -0.029*** | -0.003  | -0.032*** | -0.005   | -0.030*** | -0.003  |
|                             | (0.005)   | (0.007)  | (0.005)   | (0.007) | (0.005)   | (0.007)  | (0.005)   | (0.007) |
| Perc of Affiliated Funds    | -0.059*** | -0.019*  | -0.055*** | -0.016  | -0.058*** | -0.021*  | -0.053*** | -0.019  |
|                             | (0.008)   | (0.011)  | (0.010)   | (0.012) | (0.008)   | (0.011)  | (0.010)   | (0.012) |
| Employer Match              | 0.018***  | 0.009    | 0.019***  | 0.008   | 0.018***  | 0.009    | 0.019***  | 0.008   |
|                             | (0.006)   | (0.006)  | (0.007)   | (0.006) | (0.007)   | (0.006)  | (0.007)   | (0.006) |
| Perc in Employer Securities | -0.045**  | -0.062*  | -0.030    | -0.061  | -0.043**  | -0.061   | -0.029    | -0.059  |
|                             | (0.021)   | (0.038)  | (0.021)   | (0.038) | (0.021)   | (0.037)  | (0.021)   | (0.038) |
| Unionization                | 0.014**   | 0.009*   | 0.016***  | 0.010** | 0.014**   | 0.008    | 0.016***  | 0.009** |
|                             | (0.006)   | (0.005)  | (0.006)   | (0.005) | (0.006)   | (0.005)  | (0.006)   | (0.005) |
| Plan Age                    | -0.002    | 0.011    | -0.002    | 0.012   | -0.002    | 0.011    | -0.002    | 0.012   |
|                             | (0.004)   | (0.008)  | (0.004)   | (0.008) | (0.004)   | (0.008)  | (0.004)   | (0.008) |
| MFOptions                   | -0.000    | -0.001*  | -0.000    | -0.001  | -0.000    | -0.001*  | -0.000    | -0.001  |
|                             | (0.000)   | (0.000)  | (0.000)   | (0.000) | (0.000)   | (0.000)  | (0.000)   | (0.000) |
| Bundled Services            | 0.001     | 0.001    | 0.003*    | 0.001   | 0.001     | 0.001    | 0.003*    | 0.000   |
|                             | (0.001)   | (0.001)  | (0.002)   | (0.001) | (0.001)   | (0.001)  | (0.002)   | (0.001) |
| Flow Volatility             | -0.011    |          | -0.007    |         | -0.010    |          | -0.007    |         |
|                             | (0.012)   |          | (0.011)   |         | (0.012)   |          | (0.011)   |         |
| Plan Complexity             | 0.008***  | -0.001   | 0.008***  | -0.001  | 0.008***  | -0.001   | 0.008***  | -0.001  |
|                             | (0.002)   | (0.001)  | (0.002)   | (0.001) | (0.002)   | (0.001)  | (0.002)   | (0.001) |
| Participant Loans           | 0.352*    | 0.120    | 0.414**   | 0.212   | 0.363*    | 0.109    | 0.420**   | 0.207   |
|                             | (0.206)   | (0.516)  | (0.191)   | (0.517) | (0.207)   | (0.517)  | (0.192)   | (0.519) |
| Eligible Compensation       | -0.024*** | -0.011** | -0.024*** | -0.008  | -0.024*** | -0.011** | -0.024*** | -0.009* |
|                             | (0.007)   | (0.005)  | (0.009)   | (0.005) | (0.007)   | (0.005)  | (0.009)   | (0.005) |
| Average Fund Controls       | YES       | YES      | YES       | YES     | YES       | YES      | YES       | YES     |
| Year FE                     | YES       | YES      | YES       | YES     | YES       | YES      | YES       | YES     |
| RK FE                       | NO        | YES      | NO        | YES     | NO        | YES      | NO        | YES     |
| Plan FE                     | NO        | NO       | YES       | YES     | NO        | NO       | YES       | YES     |
| Observations                | 3,150     | 3,111    | 3,147     | 3,107   | 3,143     | 3,104    | 3,140     | 3,100   |
| R-squared                   | 0.319     | 0.866    | 0.400     | 0.871   | 0.318     | 0.866    | 0.400     | 0.871   |

**Table IA.16: Revenue Sharing and Share Class Level Expense Ratios, Other Specifications.**

The table reestimates the model  $ExpenseRatio_{p,f,t} = \beta RevenueShare_{p,f,t} + \mathbf{\Gamma}' \mathbf{Controls}_{p,f,t-1} + \epsilon_{p,f,t}$  from Table 9 using alternative fixed effects specifications. In columns 1-4,  $RevenueShare_{p,f,t}$  *Fund* is an indicator variable that takes the value of one if fund  $f$  revenue shares in plan  $p$  at the end of year  $t$ . In columns 5-8 of the table,  $RevenueShare_{p,f,t}$  *Percentage* is the amount of rebate that fund  $f$  pays to plan  $p$ 's recordkeeper at the end of year  $t$ .  $\mathbf{Controls}_{p,t}$  is the vector of control variables. In addition to those listed, the model includes fund controls, which are fund style and type dummies as well as fund age, size, and turnover. All variables are described in Table A.1. Standard errors are clustered at the fund level. Significance levels are denoted by \*, \*\*, \*\*\*, which correspond to 10%, 5%, and 1% levels, respectively.

|                             | (1)                  | (2)                  | (3)                  | (4)                  | (5)                 | (6)                  | (7)                  | (8)                  |
|-----------------------------|----------------------|----------------------|----------------------|----------------------|---------------------|----------------------|----------------------|----------------------|
| Revenue Sharing Fund        | 0.192***<br>(0.022)  | 0.036***<br>(0.008)  | 0.026***<br>(0.007)  | 0.028***<br>(0.008)  |                     |                      |                      |                      |
| Revenue Sharing Percentage  |                      |                      |                      |                      | 0.866***<br>(0.057) | 0.459***<br>(0.032)  | 0.413***<br>(0.030)  | 0.438***<br>(0.035)  |
| Prior 3-year Performance    | 0.000<br>(0.000)     | 0.000*<br>(0.000)    | 0.000**<br>(0.000)   |                      | 0.000<br>(0.000)    | 0.000**<br>(0.000)   | 0.000**<br>(0.000)   |                      |
| Style Expense Ratio         | 0.598***<br>(0.085)  | 0.238**<br>(0.098)   | 0.235**<br>(0.096)   |                      | 0.553***<br>(0.079) | 0.236***<br>(0.090)  | 0.216**<br>(0.088)   |                      |
| Log(Option Size)            | -0.004<br>(0.003)    | -0.004***<br>(0.001) | -0.002*<br>(0.001)   | -0.005***<br>(0.001) | -0.001<br>(0.003)   | -0.005***<br>(0.001) | -0.004***<br>(0.001) | -0.006***<br>(0.001) |
| Log(Plan Assets)            | -0.009*<br>(0.005)   | -0.008***<br>(0.003) | -0.036***<br>(0.012) | -0.005**<br>(0.003)  | -0.008*<br>(0.005)  | -0.002<br>(0.002)    | -0.028**<br>(0.012)  | 0.001<br>(0.002)     |
| Log(Average Account Size)   | -0.009<br>(0.006)    | -0.014***<br>(0.004) | 0.004<br>(0.010)     | -0.016***<br>(0.004) | 0.001<br>(0.006)    | -0.008***<br>(0.003) | -0.002<br>(0.010)    | -0.009***<br>(0.003) |
| Perc of Affiliated Funds    | 0.002<br>(0.015)     | -0.032***<br>(0.010) | 0.007<br>(0.015)     | -0.021***<br>(0.007) | 0.007<br>(0.015)    | -0.029***<br>(0.009) | 0.013<br>(0.015)     | -0.015**<br>(0.006)  |
| Employer Match              | -0.002<br>(0.010)    | -0.004<br>(0.004)    | -0.005<br>(0.010)    | -0.005<br>(0.003)    | 0.011<br>(0.011)    | 0.003<br>(0.004)     | -0.006<br>(0.009)    | -0.002<br>(0.004)    |
| Perc in Employer Securities | -0.011<br>(0.032)    | 0.024<br>(0.015)     | -0.002<br>(0.055)    | 0.027*<br>(0.014)    | -0.003<br>(0.028)   | 0.021<br>(0.013)     | 0.030<br>(0.054)     | 0.023*<br>(0.013)    |
| Unionization                | 0.000<br>(0.007)     | -0.008**<br>(0.003)  | -0.016**<br>(0.006)  | -0.009***<br>(0.003) | 0.001<br>(0.007)    | -0.008***<br>(0.003) | -0.018***<br>(0.006) | -0.009***<br>(0.003) |
| Plan Age                    | 0.006<br>(0.005)     | 0.002<br>(0.002)     | 0.005<br>(0.007)     | 0.002<br>(0.002)     | 0.006<br>(0.004)    | 0.001<br>(0.002)     | 0.005<br>(0.005)     | -0.000<br>(0.002)    |
| MFoptions                   | 0.002***<br>(0.000)  | 0.001***<br>(0.000)  | -0.000<br>(0.000)    | 0.001***<br>(0.000)  | 0.001***<br>(0.000) | 0.001***<br>(0.000)  | -0.000<br>(0.000)    | 0.000**<br>(0.000)   |
| Bundled Services            | 0.001<br>(0.004)     | 0.003<br>(0.002)     | 0.006**<br>(0.002)   | 0.001<br>(0.001)     | 0.000<br>(0.004)    | 0.003*<br>(0.002)    | 0.004**<br>(0.002)   | 0.004***<br>(0.001)  |
| Flow Volatility             | -0.006<br>(0.019)    | -0.010<br>(0.010)    |                      | -0.015<br>(0.010)    | 0.017<br>(0.017)    | -0.008<br>(0.008)    |                      | -0.014*<br>(0.008)   |
| Plan Complexity             | -0.001<br>(0.001)    | -0.002**<br>(0.001)  | 0.004***<br>(0.001)  | -0.002***<br>(0.001) | -0.000<br>(0.001)   | -0.001**<br>(0.001)  | 0.004***<br>(0.001)  | -0.002***<br>(0.001) |
| Participant Loans           | 0.473*<br>(0.284)    | 0.120<br>(0.151)     | -0.776<br>(0.657)    | 0.143<br>(0.151)     | 0.170<br>(0.275)    | 0.062<br>(0.139)     | -0.429<br>(0.584)    | 0.009<br>(0.119)     |
| Eligible Compensation       | -0.027***<br>(0.010) | -0.004<br>(0.006)    | -0.004<br>(0.007)    | 0.004<br>(0.005)     | -0.004<br>(0.011)   | -0.002<br>(0.006)    | -0.008<br>(0.007)    | 0.003<br>(0.004)     |
| Fund Controls               | YES                  | YES                  | YES                  | YES                  | YES                 | YES                  | YES                  | YES                  |
| Year FE                     | YES                  | YES                  | YES                  | NO                   | YES                 | YES                  | YES                  | NO                   |
| Fund FE                     | NO                   | YES                  | YES                  | NO                   | NO                  | YES                  | YES                  | NO                   |
| Plan FE                     | NO                   | NO                   | YES                  | NO                   | NO                  | NO                   | YES                  | NO                   |
| Fund-Year FE                | NO                   | NO                   | NO                   | YES                  | NO                  | NO                   | NO                   | YES                  |
| RK FE                       | YES                  | YES                  | NO                   | NO                   | YES                 | YES                  | NO                   | NO                   |
| Observations                | 9,921                | 9,664                | 9,656                | 8,632                | 9,672               | 9,410                | 9,402                | 8,409                |
| R-squared                   | 0.743                | 0.942                | 0.953                | 0.945                | 0.771               | 0.953                | 0.961                | 0.956                |
